# Supplementary material for: Release of Interferon-β (IFN-β) from Probiotic Limosilactobacillus reuteri-IFN-β (LR-IFN-β) Mitigates Gastrointestinal Acute Radiation Syndrome (GI-ARS) following Whole Abdominal Irradiation
Source: MDPI journal article supplement (doi:10.3390/cancers15061670), 2023-03-08

Supplemental Figure S1. Luminex Assay demonstrating significant changes in protein expression of LR-IFN-β in the intestine following 12 Gy TBI.

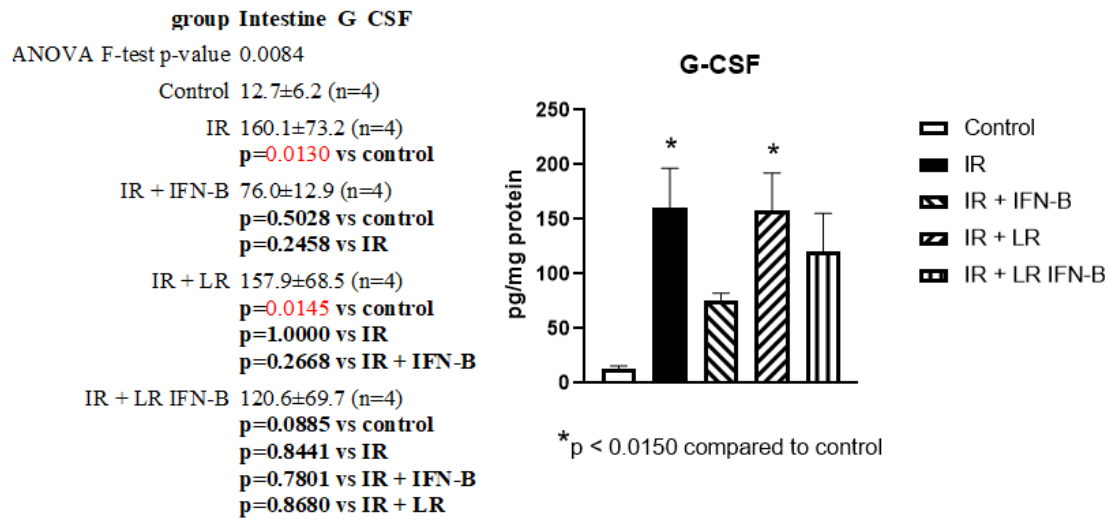

Supplemental Figure S2. Luminex assay demonstrating significant changes in protein expression of LIF in the intestine following 12 Gy TBI.

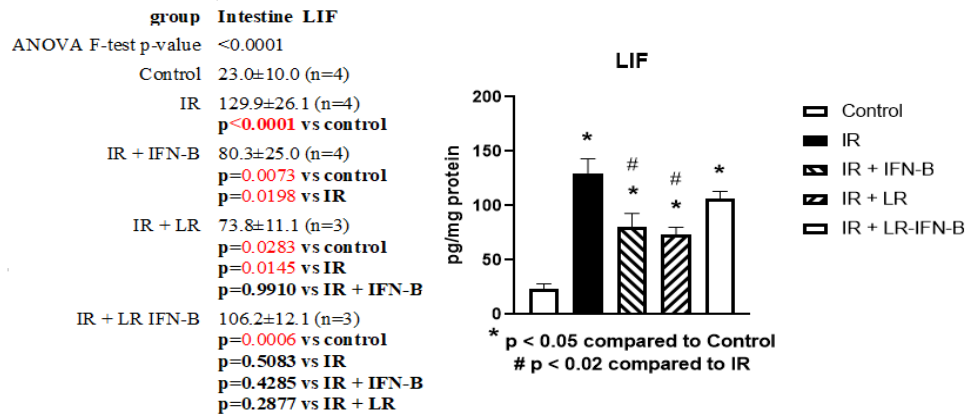

Supplemental Figure S3. Luminex assay demonstrating significant changes in protein expression of M-CSF in the intestine following 12 Gy TBI.

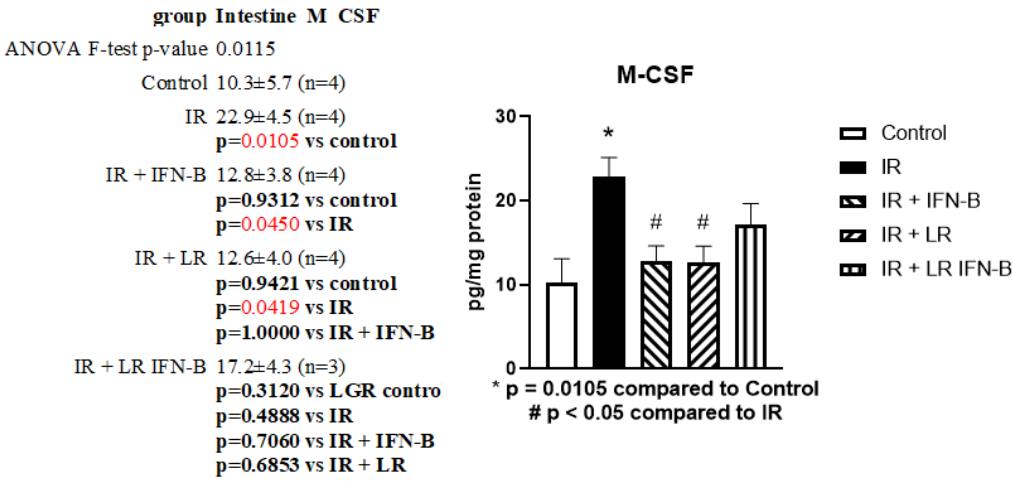

Supplemental Figure S4. Luminex assay demonstrating significant changes in protein expression of MIG in the intestine following 12 Gy TBI.

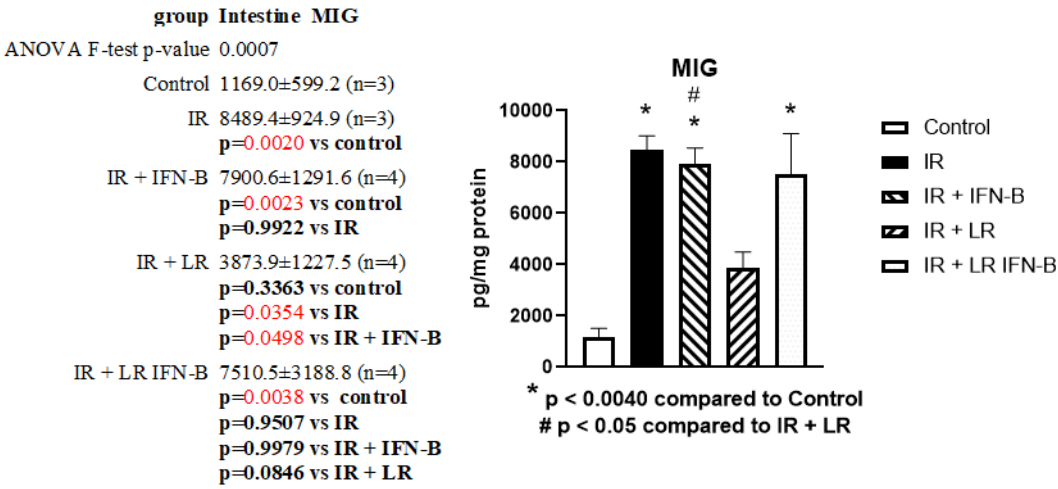

Supplemental Figure S5: Luminex assay demonstrating significant changes in protein expression of TNF- $\alpha$  in the intestine following 12 Gy TBI.

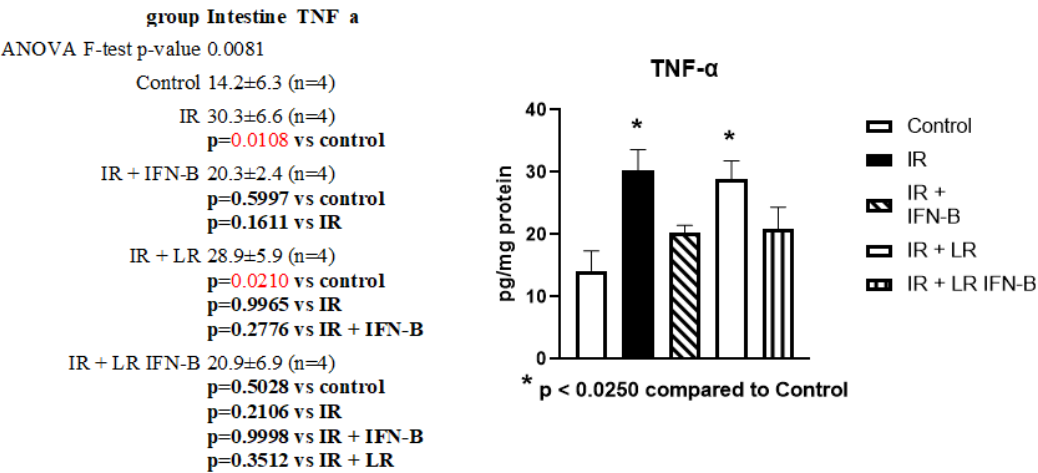

Supplemental Figure S6. Luminex assay demonstrating significant changes in protein expression of G-CSF in the plasma following 12 Gy TBI.

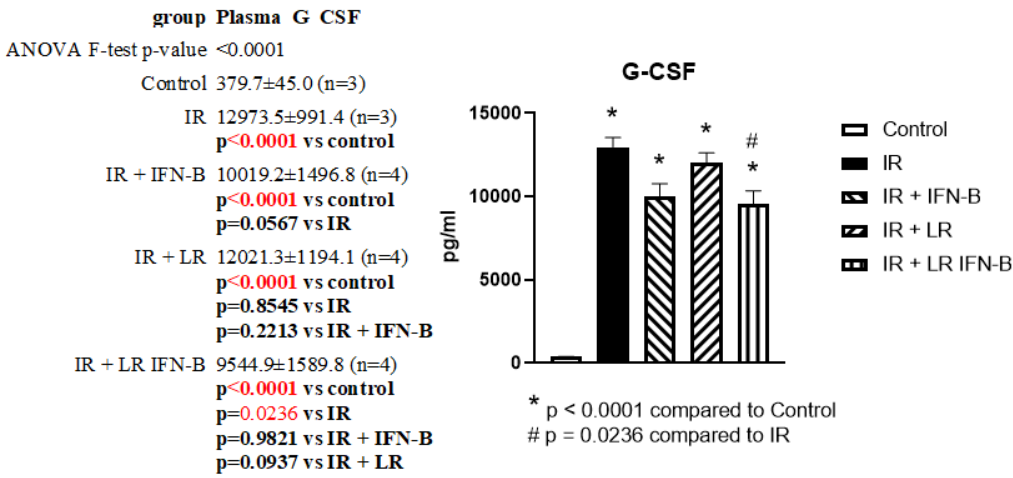

Supplemental Figure S7. Luminex assay demonstrating significant changes in protein expression of Eotaxin in the plasma following 12 Gy TBI.

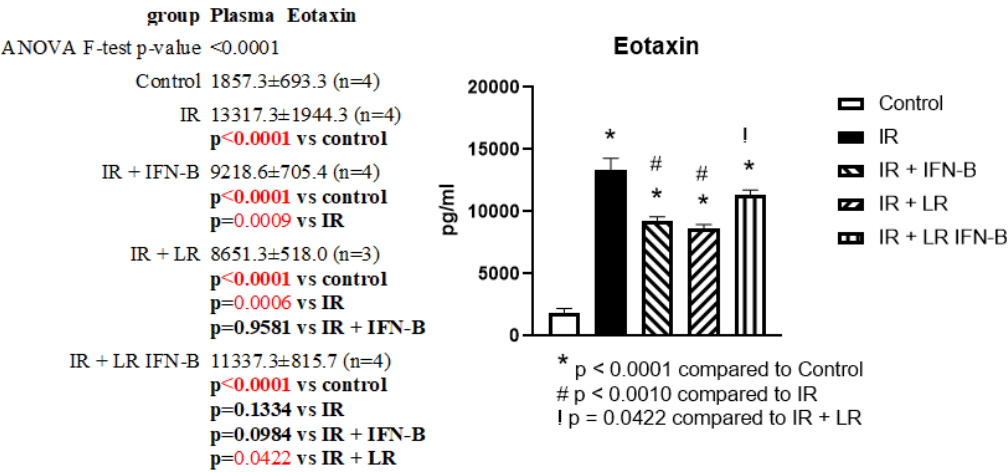

Supplemental Figure S8. Luminex assay demonstrating significant changes in protein expression of Lix in the plasma following 12 Gy TBI.

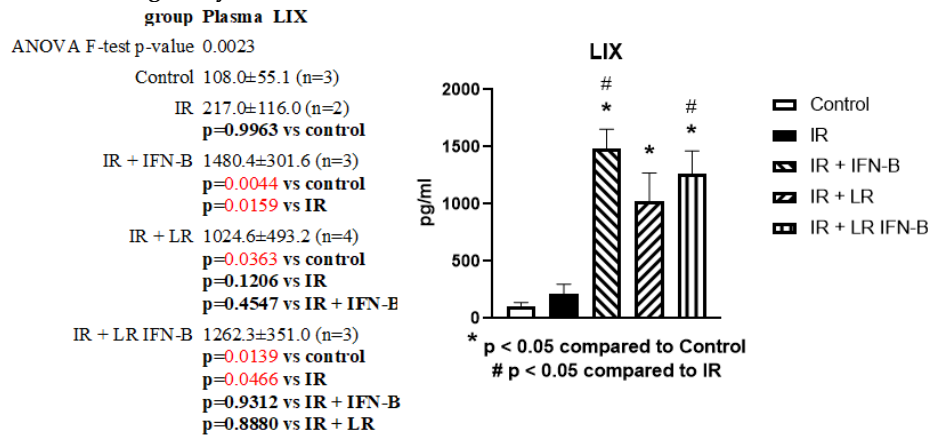

Supplement: s1 [file s1]
